### Double check discharge planning to improve the results of a heart failure programme

L. Alcobero<sup>1</sup>, J. Vime<sup>1</sup>, C. Enjuanes<sup>1</sup>, S. Jimenez<sup>1</sup>, A. Garay<sup>1</sup>, S. Yun<sup>1</sup>, P. Moliner<sup>1</sup>, C. Guerrero<sup>1</sup>, E. Hidalgo<sup>1</sup>, E. Calero<sup>1</sup>, R. Marin<sup>1</sup>, L. Alcobero<sup>2</sup>, C. Delso<sup>2</sup>, J. Comin<sup>1</sup>

<sup>1</sup>University Hospital of Bellvitge, Hospitalet De Llobregat, Spain; <sup>2</sup>Delta Primary Care Service, ICS, Hospitalet de Llobregat, Spain

**Funding Acknowledgement:** Type of funding source: Public hospital(s). Main funding source(s): Hospital Universitari de Bellvitge

**Background:** Reduction of readmissions in heart failure (HF) patients is a main goal of HF programmes. Establishing a discharge planning for the patient and coordinating it with primary care teams are key aspects for their success.

**Purpose:** Evaluate whether a double check discharge planning based on adding face-to-face joint weekly sessions with primary care managers to the conventional electronic communication of care plan reduces 6-month readmission and 6-month mortality.

**Methods:** We evaluated all patients discharged from hospital with HF as primary diagnosis between September 2017 and January 2019. We compared outcomes between patients discharged during Period #1 (single check; September 2017 - April 2018) and those discharged during Period #2 (double check; May 2018 - January 2019).

Primary endpoint was the combined endpoint of all-cause death or all-

cause hospitalization 6 months after discharge from the index hospitalization.

**Results:** The study enrolled 317 patients: 182 in Period #1 and 135 in Period #2.

Mean age was 76±9 years. There was a higher proportion of patients with diabetes and COPD in Period #1, with no differences in other baseline characteristics.

The combined endpoint of all cause-death and all-cause hospitalization at 6 months was significantly reduced in patients in the double check discharge planning group (27% vs. 16%, p 0.021).

**Conclusions:** In a HF programme, the addition of a double check discharge planning based on having joint weekly sessions with primary care managers on top of the conventional electronic communication of care plan reduces 6-month readmission and 6-month mortality.

|                                              | Unadjusted analyses                 |                                     |       | Adjusted analyses    |       |
|----------------------------------------------|-------------------------------------|-------------------------------------|-------|----------------------|-------|
|                                              | Single check discharge planning (%) | Double check discharge planning (%) | p     | *Odds Ratio (95% CI) | p     |
| All-cause death or all-cause hospitalization | 50 (27)                             | 22 (16)                             | 0.021 | 0.53 (0.32–0.86)     | 0.011 |
| All-cause hospitalization                    | 51 (28)                             | 23 (17)                             | 0.023 | 0.57 (0.32–1.01)     | 0.056 |
| All-cause death or CV hospitalization        | 33 (18)                             | 13 (10)                             | 0.037 | 0.48 (0.24–0.94)     | 0.035 |
| All-cause death or HF hospitalization        | 28 (15)                             | 11 (8)                              | 0.058 | 0.48 (0.23–1.01)     | 0.054 |

\*Comparison of double check discharge planning vs. single check discharge planning (reference category).

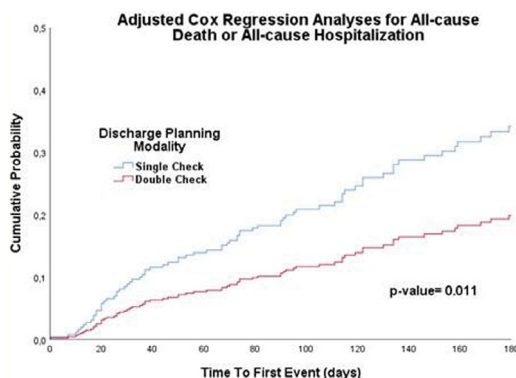

Source: http://academic.oup.com/eurheartj/article-pdf/41/Supplement_2/ehaa946.1125/34522092/ehaa946.1125.pdf
